# Supplementary material for: Photo-doping of plasma-deposited polyaniline (PAni)
Source: Royal Society of Chemistry journal article supplement (doi:10.1039/c6ra12886f), 2016-01-01
Supplement: c6ra12886f1.pdf [file c6ra12886f1.pdf]

Supporting Information

## Photo-doping of plasma-deposited polyaniline (PAni)

Sait Elmas<sup>a\*</sup>, Wesley Beelders<sup>a</sup>, Joseph Nash<sup>a</sup>, Thomas J. Macdonald<sup>b</sup>, Marek Jasieniak<sup>a</sup>, Hans J. Griesser<sup>a</sup>, and Thomas Nann<sup>a,c</sup>

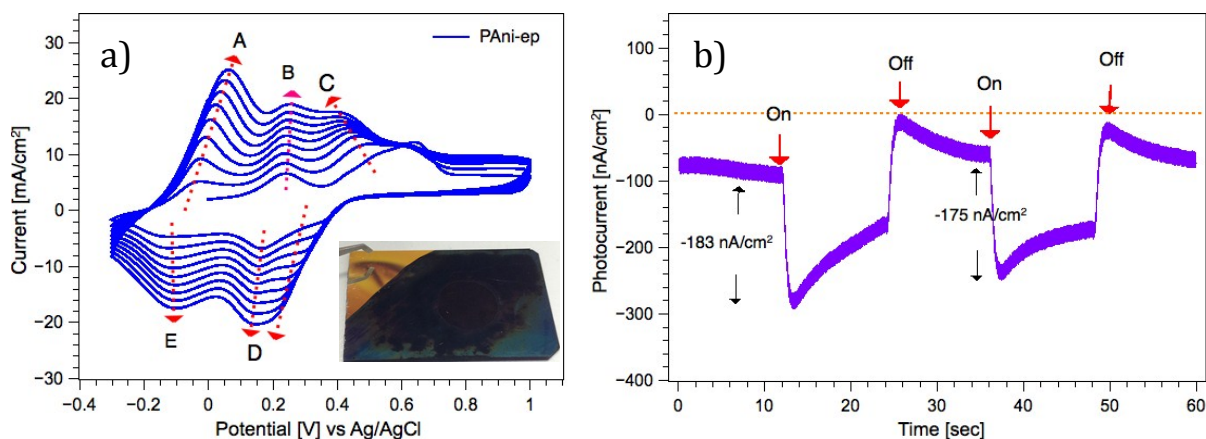

**Figure S 1:** a) Cyclic voltammogram of the electropolymerisation of aniline (0.02 molar) in a 0.5 M H<sub>2</sub>SO<sub>4</sub> solution. The solution was swept (10 scans, 1<sup>st</sup> scan not shown) at a scan rate of 100 mV/s between -0.3 and +1.0 V vs. Ag|AgCl (3M KCl); inset shows a photographic picture of the electropolymerised PAni (PAni-ep) film grown on a gold substrate; b) photocurrent response of PAni-ep in 0.1M PBS solution recorded at the OCP.
